# Supplementary material for: FOLDNA, a Web Server for Self-Assembled DNA Nanostructure Autoscaffolds and Autostaples
Source: Hindawi journal article supplement (doi:10.1155/2012/453953), 2012-01-01
Supplement: f1 [file 453953.f1.pdf]

## **SUPPLEMENTARY MATERIAL**

# **FOLDNA, a web server for self-assembled DNA nanostructure auto-scaffolds and auto-staples**

Chensheng Zhou<sup>#1</sup>, Heng Luo<sup>#1</sup>, Xiaolu Feng<sup>1</sup>, Xingwang Li<sup>1</sup>, Jie Zhu<sup>1</sup>, Lin He<sup>1</sup>, and Can Li<sup>1</sup>

<sup>#</sup> These authors contributed equally to this work.

<sup>1</sup>*Bio-X Institutes, Shanghai Jiao Tong University, 1954 Huashan Rd, Shanghai 200030, China*

Correspondence should be addressed to Can Li, [lican8@gmail.com](mailto:lican8@gmail.com)

The scaffold DNA used by us is M13mp18. The selected shapes for wet-lab experiment validation are a hexagon, a rabbit and a panda (Figure 2A). Scaffold and staple DNA pathways (formed structures) as well as the corresponding staple DNA sequences are shown in the following materials.

[illegible][illegible]

Figure S3: The scaffold pathway of the rabbit in Figure 2C

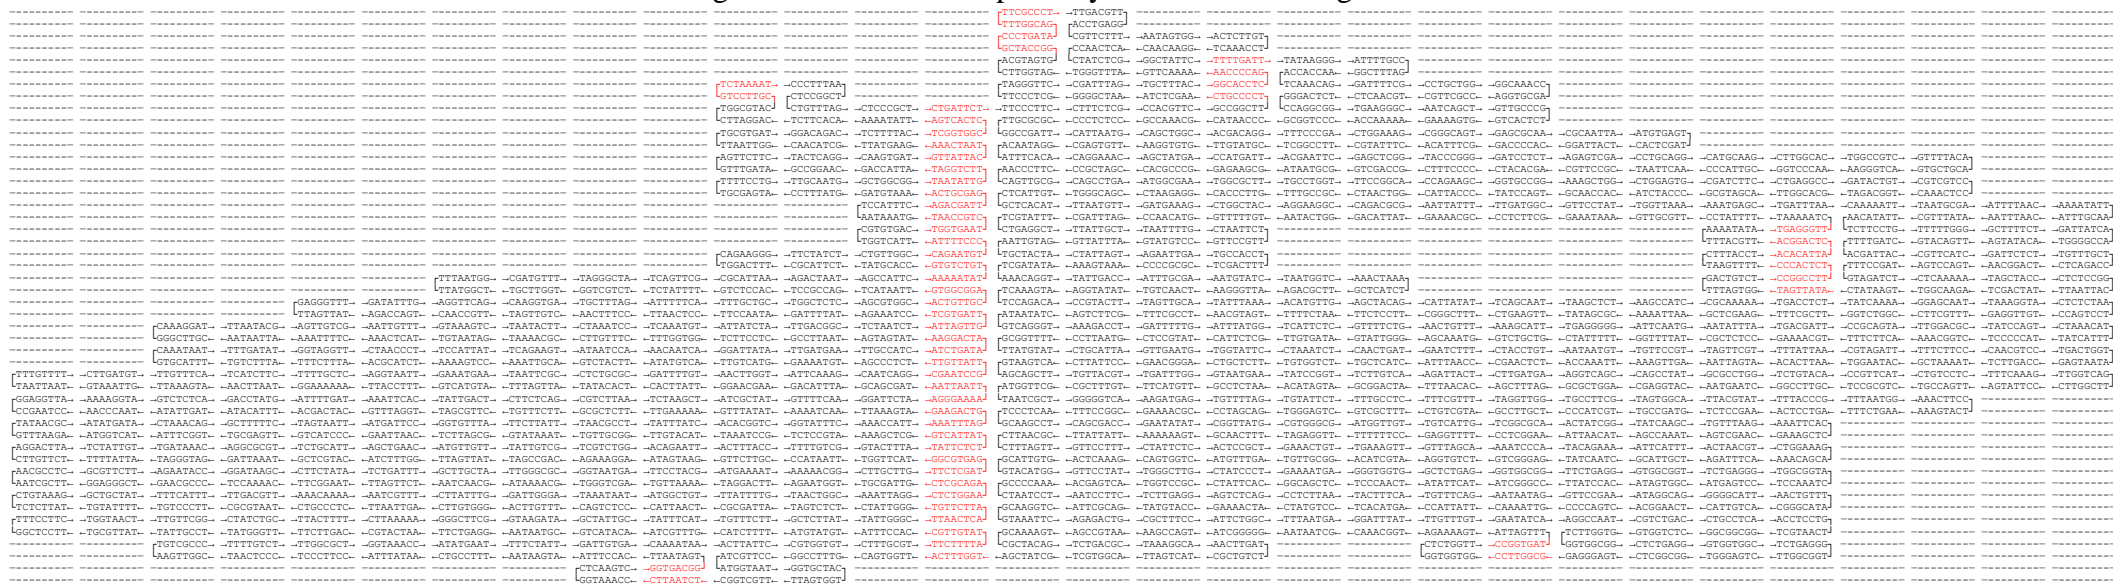

Figure S4: The staple pathway of the rabbit in Figure 2C

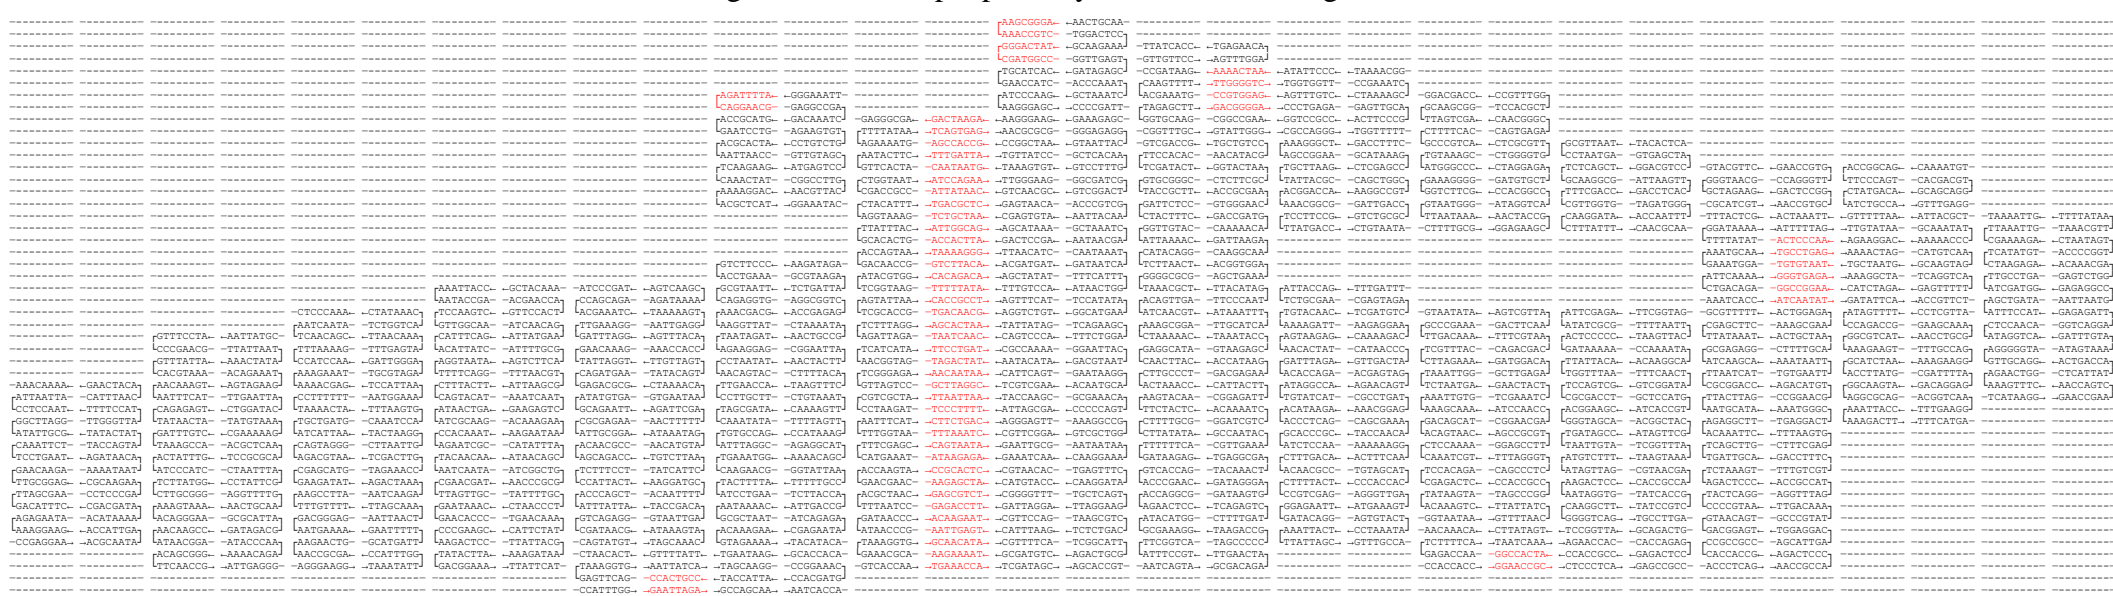



Staple DNA sequences for the hexagon in Figure 2B

[0] CAAATTCTTACCAGTATATCATATGCGTTATAGGCTTAGG  
[1] TTGGGTTATACCTTTTTAACCTCC  
[2] TTTAAAAGTTTGAGTAACATTATC  
[3] ATTTTGCGAAAGAAATTGCGTAGATTTTCAGG  
[4] TTTAACGTATTAATTACATTTAACAATTTTCAT  
[5] TTGAATTACATAGGTCTGAGAGACTATAACTA  
[6] TATGTAAAGAAAAAGCCTGTTTAGTAAAGCCA  
[7] ACGCTCAAACGCGCCTGTTTATCAACAATAGA  
[8] TAAGTCCTGCGCCCAATAGCAAGCAAATCAGATATAGAAG  
[9] GTCAGAGGGTAATTGAGAACACCCTGAACAAAGCCAGTTA  
[10] AGATAAAAAATACCGAACGAACCA  
[11] AATTGAGGGTTGGCAAATCAACAGCCAGCAGA  
[12] AAACCACCCCCGAACGTTATTAATTTGAAAGG  
[13] TATACAGTCACGTAAACAGAAATGAACAAAG  
[14] AATGGAAAACATCAAGAAAACAAACAGATGAA  
[15] CAAATCCAGTGAATTTATCAAAATCCTTTTTT  
[16] CTTAATTGGGAATCATAATTACTATGCTGATG  
[17] AAAATAATGTTTCAGCTAATGCAGACAGTAGGG  
[18] GGTATTCTCGTAGGAATCATTACCGAACAAGA  
[19] CAAAATAATTCCAGAGCCTAATTTGCTTATCC  
[20] TTTTATAATCAGTGAGGCCACCGA  
[21] GTAAAAGACTGGTAATATCCAGAACAATATTA  
[22] CCGCCAGCACCAGTAATAAAAGGGACATTCTG  
[23] GCCAACAGAAACATCGCCATTAAACAGAGGTG  
[24] AGGCGGTCAATCAATATCTGGTCAAAGGTTAT  
[25] CTAAAATACGTATTAAATCCTTTGAGAAGGAG  
[26] CGGAATTAATATCAAAATTATTTGAACAGTAC  
[27] CTTTTACAGAAGATGATGAAACAACAGTACAT  
[28] AAATCAATCTGAGAAGAGTCAATAATCGCAAG  
[29] ACAAAGAAAATAAGAATAAACACCAGAATCGC  
[30] CATATTTACGACAATAAACACATATCCCATC  
[31] CTAATTTACCGTTTTTTATTTTCATAAGAACGC  
[32] GAGGCGTTACGCTAACGAGCGTCTACAGCCAT  
[33] ATTATTTAGACGGGAGAATTAAGTGCCTAAT  
[34] ATCAGAGAGCAGATAGCCGAACAAAGTTACCA  
[35] GAAGGAAATAAAGGTGGCAACATATAAAAGAA  
[36] ACGCAAAGAGGGAAGGTAAATATTGACGGAAATTATTCAT  
[37] GTCACCAATGAAACCATAGCAAGGCCGGAACTAAAGGTG  
[38] TCCTCGTTTTTGACGAGCACGTATA  
[39] ATCACGCAGAATCCTGAGAAGTGTACGTGCTT  
[40] CAGGAAAACAACTATCGGCCTTGGTCTGTCC

[41] CCCTTCTGATTACCCAGTCACACGCATTGCAA  
[42] CACCGCCTCGAACTGATAGCCCTAAGATAGAA  
[43] AGCACTAACAAATATCAAACCCTCAGTATTAA  
[44] TTCCTGATAAACAATTCGACAACCTTCTTTAGG  
[45] AACATAAAGGGTTAGAACCTACCTCATCATA  
[46] GTGAATAAAATTACCTGAGCAAAATCGGGAGA  
[47] AACTTTTTAGCTTAGATTAAGACGATATGTGA  
[48] AACATGTAGATAAATAAGGCGTTACGCGAGAA  
[49] TAGAAACCAATTCTGTCCAGACGAACAACGCC  
[50] CCTCCCGAATCGAGAACAAGCAAGCGAGCATG  
[51] CAAATAAGATCCTGAATCTTACCATTAGCGAA  
[52] ACAAGAATACAGGGAAGCGCATTATCCCAATC  
[53] ACGCAATATTTTTAAGAAAAGTAAGATAACCC  
[54] GAATAAGTGTAGAAAATACATACACCGAGGAA  
[55] AATTATCATTC AACCGATTGAGGGACACCACG  
[56] GCGTACTATGGTTGCTAGAAATCAG  
[57] AGCGGGAGCAGGAACGGTACGCCAAATTAACC  
[58] GTTGTAGCCCTGAGTAGAAGAACTACGCTCAT  
[59] GGAAATACTTATTTACATTGGCAGACCTGAAA  
[60] GCGTAAGAATTAGTCTTTAATGCGGCAACAGT  
[61] GCCACGCTTCACCTTGCTGAACCTCAACTAAT  
[62] AGATTAGAAAGTATTAGACTTTACTATCAGAT  
[63] GATGGCAAACCTTCTGAATAATGGACGGATTCTG  
[64] CCTGATTGGCGAATTATTCATTTCCCTTGCTT  
[65] CTGTAAATTTGAAAACATAGCGATCAAATATA  
[66] TTTTAGTTGAAATACCGACCGTGTATTTAGGC  
[67] AGAGGCATCGACAAAAGGTAAAGTAATCAATA  
[68] ATCGGCTGACCAAGTACCGCACTCCTTGCGGG  
[69] AGGTTTTGACCCAGCTACAATTTTAAACGATT  
[70] TTTTGTTTAGAGAATAACATAAAATGAGTTAA  
[71] GCCCAATATATCTTACCGAAGCCCATAACGGA  
[72] ATACCCAACAGTATGTTAGCAAACCTTATTTTG  
[73] TCACAATCAGACAAAAGGGCGACACCGTCACC  
[74] GACTTGAGGTAGCACCATTACCATTCGATAGCAGCACCGT  
[75] ATTTTAGACTAAACAGGAGGCCGAAAACCGTC  
[76] ATCACTTGAATACTTCTTTGATTAGGTTTGCC  
[77] GAAATGGACTACATTTTGACGCTCTTGCGCTC  
[78] GAATGGCTATACGTGGCACAGACAGTGCCAAG  
[79] CTAAAGCAGAGAGCCAGCAGCAAAGGCCTCAG  
[80] GGATTTAGGCCGTCAATAGATAATTTAAATCA  
[81] TGGATTATTTTCATCAATATAATCCGATATTCA  
[82] GCGCAGAGCTTTGAATACCAAGTTTTAACATC

[83] TAGAATCCCGTCGCTATTAATTAAAGAGGTCA  
[84] AATGGTTTAAATTTTCATCTTCTGACATGTTTAG  
[85] TAAAGTACTTTTCGAGCCAGTAATAACCAGTCA  
[86] GGTATTAATCTTTCCTTATCATTCTGACCAA  
[87] TATTTTGCAAGCCTTAAATCAAGAAAAGACTT  
[88] CTTTACAGAACGTCAAAAATGAAATAATTGTA  
[89] GCAATAGCATAAGAGCAAGAAACAACAACGCC  
[90] TTATTACGAAGAACTGGCATGATTCCGTCGAG  
[91] AGCGCCAAAATAGAAAATTCATATGATACAGG  
[92] AATCACCACCATTGTTGGGAATTAGACCCTCAGA  
[93] AATCAGTAGCGACAGAATCAAGTTTGCCTTTA  
[94] CGAGAAAGGAAGGGAATGCGCCGCTACAGGGC  
[95] TATCAGGGAACGTCAAAGGGCGAATTAAAGGG  
[96] CCAGCAGGGCAAGCGGTCCACGCTGTAATAAC  
[97] ACTGCCCGACTCACATTAATTGCGAATCGTCT  
[98] CTTGCATGTGTAAAACGACGGCCAATATTTTT  
[99] GAAGATCGGGACGACGACAGTATCTGAAAAAT  
[100] GCTCATTTTCGCATTAAATTTTTGACATTTGA  
[101] ACCGTTCTAAATCACCATCAATATTGATTGTT  
[102] CAATAAATACTAATAGTAGTAGCAACAAAATC  
[103] TTTTTGCGATTGCTCCTTTTGATATTTTCCCT  
[104] ACTGGATAAGGGGGTAATAGTAACTAAATTT  
[105] GGACGTTGAGAACTGGCTCATTATAGAGAATA  
[106] CTTTGAAATCATAAGGGAACCGAACAAGAACG  
[107] TTTTCATGAAGAGGCTTTGAGGACTTTAGTTGC  
[108] TCGGTTTACTCCAAAAGGAGCCTTATAGCAGC  
[109] TGTAGCATGTCACCAGTACAACTATGAAATA  
[110] AGGGTTGAACCAGGCGGATAAGTGAAGACTCC  
[111] AGTGTACTATACATGGCTTTTGATGGTTTACC  
[112] GCCACCACACCCTCAGAACCGCCAGCCAGCAA  
[113] GCGTCAGACTGTAGCGCTCCCTCAGAGCCGCCCTCAGAG  
[114] CACTACGTAAGCCGGCGAACGTGG  
[115] CTGTTTGAAAAGAACGTGGACTCCCGATGGCC  
[116] TCGGGAAACCCTGAGAGAGTTGCACGAAAATC  
[117] TCGACTCTCCTAATGAGTGAGCTACTTTCCAG  
[118] CCAGCTTTTTTCCCAGTCACGACGTCCTGCAGG  
[119] ATAGGAACATCTGCCAGTTTGAGGCACTCCAG  
[120] AATTAATGAATATTTTGTTAAAATTTTAACCA  
[121] CAAGGCAAAGGCCGGAGACAGTCAGCTGATA  
[122] AGAGCTTAAGGTGGCATCAATTCTCATACAGG  
[123] TACTGCGGTTAGAGAGTACCTTTAGATGGCTT  
[124] AATCTACGAAAGAAGTTTTGCCAGGCGTCCAA

[125] ATGAACGGACCTTATGCGATTTTAGGAAGAAA  
 [126] CCATTAAAAGGCGCAGACGGTCAAGAGGACAG  
 [127] CTTTCGAGGGGTAGCAACGGCTACGGAAGTTT  
 [128] CAGCCCTCATCTCCAAAAAAAGGTCAGCTTG  
 [129] TAGCCCGGCGTAACACTGAGTTTCTCCACAGA  
 [130] GTTTTAACCGGGGTTTTGCTCAGTTATAAGTA  
 [131] CCGCCACCCGTTCCAGTAAGCGTCGGTAATAA  
 [132] TAGAGCTTGACGGGGAGAACCATC  
 [133] ACCCAAATACAAGAGTCCACTATTTGGTGGTT  
 [134] CCGAAATCGCCCTTACCGCCTGGCCTGTCGT  
 [135] GCCAGCTGTGTAAAGCCTGGGGTGAGAGGATC  
 [136] CCCGGGTAGGGTAACGCCAGGGTTCCGGCACC  
 [137] GCTTCTGGCGCATCGTAACCGTGCGCCATCAA  
 [138] AAATAATTTTAAATTGTAAACGTTCCGGAGAG  
 [139] GGTAGCTAATTCAAAAGGGTGAGAAGAATTAG  
 [140] CAAAATTAGGGGCGCGAGCTGAAAATTGCTGA  
 [141] ATATAATGCTCCAACAGGTCAGGAAATCGTCA  
 [142] TAAATATTGCGAGAGGCTTTTGCATTAATAAA  
 [143] ACGAACTATTAATCATTGTGAATTTGTACAGA  
 [144] CCAGGCGCTTACTTAGCCGGAACGCGGGTAAA  
 [145] ATACGTAAGACAGCATCGGAACGAGTGAATTT  
 [146] CTAAACATTTTTTTCACGTTGAAAATAGTTAG  
 [147] CGTAACGAATAGGAACCCATGTACAATAGGTG  
 [148] TATCACCGGAAGGATTAGGATTAGGGGGTCAG  
 [149] TGCCTTGACAGTCTCTGAATTTACAGAACCAC  
 [150] CACCAGAGCCACCACCGGAACCGCCGTTTTTCATCGGCATT  
 [151] TTCGGTCATAGCCCCCATCACCGGAACCAGAGCCGCCGCC  
 [152] TTGGGGTCAAGGGAGCCCCCGATT  
 [153] CCCTTATAGTTGTTCCAGTTTGGACAAGTTTT  
 [154] AATCGGCCCCGGGCAACAGCTGATTGGCAAAAT  
 [155] GAATTCGTAGCCGGAAGCATAAAGCATTAAATG  
 [156] ACCAGGCAGCAAGGCGATTAAAGTTCCGAGCTC  
 [157] GCCTTCCTCGTTGGTGTAGATGGGTGCCGGAA  
 [158] AGATCTACTTGTATAAGCAAATATCGCGTCTG  
 [159] AGCCTCAGTAATGTGTAGGTAAAGTTTTTGAG  
 [160] CAACATGTAGCTATATTTTCATTTAGCAATAA  
 [161] CCCCTCACCCAGACCGGAAGCAAACCTGTAGCT  
 [162] ACATTATTGATAAAAACCAAAATACATTGAAT  
 [163] GCTGACCTTGGTTTAATTTCAACTACGGAACA  
 [164] CGAAGGCACGCGACCTGCTCCATGATAGGCTG  
 [165] CCGATAGTACCCTCAGCAGCGAAATGCCACTA  
 [166] TTTGTCGTGAATTGCGAATAATAAGCTTGATA



[167] AGGTTTAGAGGGATAGCAAGCCCATCTAAAGT  
 [168] GCCCGTATCTGAGACTCCTCAAGATACTCAGG  
 [169] AGCATTGAGCCAGAATGGAAAGCGGTAACAGT  
 [170] CTAAATCGGAACCCTAGAGGTGCC  
 [171] GTAAAGCACGAGATAGGGTTGAGTAATCAAAA  
 [172] GAATAGCCCTTTTCACCAAGTGAGAAACGCGCG  
 [173] GGGAGAGGTTCCACACAACATACGAATCATGG  
 [174] TCATAGCTGAAAGGGGGATGTGCTAAGCGCCA  
 [175] TTCGCCATGTAATGGGATAGGTCAGTAGCCAG  
 [176] CTTTCATCCCCAAAAACAGGAAGAAAAGGCTA  
 [177] TCAGGTCAAAATGCAATGCCTGAGAGCATAAA  
 [178] GCTAAATCGGTCAATAACCTGTTTTTTAAATA  
 [179] TGCAACTACGAGCTTCAAAGCGAAAATGCTTT  
 [180] AAACAGTTTCGTTTACCAGACGACACAGGTAG  
 [181] AAAGATTCTAAATTGGGCTTGAGATCATCAAG  
 [182] AGTAATCTAAATTGTGTCGAAATCCCAACCTA  
 [183] AAACGAAACTTTTGCGGGATCGTCTGCGCCGA  
 [184] CAATGACAAAAGGAACAATAAGCTTTCCAG  
 [185] ACGTTAGTCACCACCCTCATTTTCTACCGCCA  
 [186] CCCTCAGATGAAAGTATTAAGAGGAAACAGTT  
 [187] AATGCCCCATAAATCCTCATTAACAGGAGGT  
 [188] TGAGGCAGTCTTTTCATAATCAAATTATTAGCGTTTGCCA  
 [189] GTCAGACGATTGGCCTTGATATTCACAAACAACCTGCCTAT  
 [190] GTATTGGGCGCCAGGGTGGTTTTT  
 [191] TGTGAAATTGTTATCCGCTCACAACGGTTTGC  
 [192] CGCAACTGTATTACGCCAGCTGGCGTTTCCTG  
 [193] ATGTGAGCAAACGGCGGATTGACCTCAGGCTG  
 [194] GAGTCTGGTGATAATCAGAAAAGCAACATTAA  
 [195] CAAAAACAAACCCTCATATATTTTTTGCCTGA  
 [196] TGTCTGGAGATACATTTTCGCAAATGGTTGTAC  
 [197] GAGAATGAATATCGCGTTTTTAATTAAGTACGG  
 [198] AGATTTAGAACACTATCATAACCCAGAAAAC  
 [199] ACCGGATAACACCAGAACGAGTAGATCAGTTG  
 [200] AGAATACATGTATCATCGCCTGATTGACAAGA  
 [201] CGCCCACGAGGGAGTTAAAGGCCGGAGGCAAA  
 [202] TTTCTGTAAGCGGAGTGAGAATAGACAACCAT  
 [203] CCTCAGAACCGCCACCCTCAGAGCAAATGAAT  
 [204] TTCGGAACCTATTATTCTGAAACAACCGCCAC  
 [205] GTGCGGGCCTCTTCGCTTGGGAAG  
 [206] GGCGATCGGATTCTCCGTGGGAACGAGTAACA  
 [207] ACCCGTCGTCATATGTACCCCGGTAGCAAACA  
 [208] AGAGAATCGGATAAAAATTTTTAGTTATGACC

[209] CTGTAATATTTAGTTTGACCATTAAGTTTCAT  
 [210] TCCATATAGCCCGAAAGACTTCAACCATAAAT  
 [211] CAAAAATCGAGGCATAGTAAGAGCGAATACCA  
 [212] CATTCAACCTTGCCCTGACGAGAATTCATTAC  
 [213] CCAAATCAAAGTACAACGGAGATTCTAAAACA  
 [214] CTCATCTTGGTCGCTGAGGCTTGCCATAACCG  
 [215] ATATATTCAACTTTCAACAGTTTCTGGGATTTTGCTAAAC  
 [216] TGACCCCGAGCGATTATACCAAGCGCGAAACAACGTAACA  
 [217] GTAATCGTAAAACTAGCATGTCAA  
 [218] GGAGAAGCCTTTATTTCAACGCAAGATGAACG  
 [219] TTCCCAATTCTGCGAACGAGTAGACTTTTGCG  
 [220] ACCCTGACAAAAGATTAAGAGGAAACAGTTGA  
 [221] ATACATAACGCCAAAAGGAATTACAGGTCTTT  
 [222] AAGCTGCTCATTCAGTGAATAAGGTAATGCAG  
 [223] AAAGCGGATTGCATCATATTATAGTCAGAAGC

Staple DNA sequences for the rabbit in Figure 2C

[0] CCGAGGAAACGCAATAAGTTACCAGAAGGAAAAGAGAATA  
 [1] CATTTAACACATCAAGAAAACAAA  
 [2] TTGGGTATACCTTTTTAACCTCCATTAATTA  
 [3] TACCAGTATATCATATGCGTTATAGGCTTAGG  
 [4] AAAATAATACAATAGATAAGTCCTCAAATTCT  
 [5] CCTCCCGAAAGAACGCGAGGCGTTGAACAAGA  
 [6] ACATAAAAATAGCAGCCTTTACAGTTAGCGAA  
 [7] CGTATTAAATCCTTTGCCCGAACG  
 [8] TTATTAATATATCAAAATTATTTGCACGTAAA  
 [9] ACAGAAATGAAGATGATGAAACAAAATTTTCAT  
 [10] TTGAATTACATAGGTCTGAGAGACTATAACTA  
 [11] TATGTAAAGAAAAAGCCTGTTTAGTAAAGCCA  
 [12] ACGCTCAAACGCGCCTGTTTATCAATCCCATC  
 [13] CTAATTTAGCTTATCCGGTATTCTCTTGCGGG  
 [14] AGGTTTTGAACGTCAAAAATGAAAACAGGGAA  
 [15] GCGCATTAGCAGATAGCCGAACAAATAACGGA  
 [16] ATACCCAAAGACAAAAGGGCGACATTCAACCGATTGAGGG  
 [17] AGGGAAGGTAAATATTGGTTTACCAGCGCCAAAAGAACTG  
 [18] TCTGGTCACAAATATCAAACCCTC  
 [19] TTTGAGTAAACAATTCGACAATAATCAATA  
 [20] TGCGTAGAAGGGTTAGAACCTACCTTTAAAAG  
 [21] AATGGAAAAATTACCTGAGCAAAAAAAGAAAT  
 [22] CAAATCCAGTGAATTTATCAAAATCCTTTTTT  
 [23] CTTAATTGGGAATCATAATTACTATGCTGATG  
 [24] TAGAAACCGTTCAGCTAATGCAGACAGTAGGG

[25] AATCAAGAAAATCAGATATAGAAGCGAGCATG  
[26] AATTAACATAACGATTTTTTGTTTAAGCCTTA  
[27] GCATGATTTTTTTAAGAAAAGTAAGACGGGAG  
[28] AAACATCGCCATTAAAAATACCGA  
[29] ACGAACCATCACCTTGCTGAACCTGTTGGCAA  
[30] ATCAACAGAAGTATTAGACTTTACACATTATC  
[31] ATTTTGCGACTTCTGAATAATGGATTTTCAGG  
[32] TTTAACGTGCGAATTATTCATTTCCAGTACAT  
[33] AAATCAATCTGAGAAGAGTCAATAATCGCAAG  
[34] ACAAAGAAAATAAGAATAAACACCAGAATCGC  
[35] CATATTTACGACAATAAACACATAATCAATA  
[36] ATCGGCTGGCGCCCAATAGCAAGCTTAGTTGC  
[37] TATTTTGCTCCCAATCCAAATAAGGAACACCC  
[38] TGAACAAATATCTTACCGAAGCCCAAGACTCC  
[39] TTATTACGAATAGAAAATTCATATGACGGAAATTATTCAT  
[40] CAGTATGTTAGCAAACATGAAATAGCAATAGCGTCAGAGG  
[41] GACTTGAGTAAAGGTGAATTATCATAGCAAGG  
[42] CCATTTGGGAATTAGAGCCAGCAAAATCACCA  
[43] AGATAAAACGAACTGATAGCCCTA  
[44] AATTGAGGTGAAAAATCTAAAGCACCAGCAGA  
[45] AAACCACCACATTTGAGGATTTAGTTGAAAGG  
[46] TATACAGTTGATTGTTTGGATTATGAACAAAG  
[47] GTGAATAAACAAAATCGCGCAGAGCAGATGAA  
[48] AACTTTTTAGCTTAGATTAAGACGATATGTGA  
[49] AACATGTAGATAAATAAGGCGTTACGCGAGAA  
[50] TATCATTCAATTCTGTCCAGACGAACAACGCC  
[51] ACAATTTTCGTAGGAATCATTACCTCTTTCCT  
[52] GTAATTGAACAGCCATATTATTTAACCCAGCT  
[53] TTAAAGGGATTTTAGACAGGAACG  
[54] GAGGCCGACTAACAGGTACGCCAGAATCCTG  
[55] AGAAGTGTGTCTGTCCATCACGCAAATTAACC  
[56] GTTGTAGCCCTGAGTAGAAGAACTCAAACAT  
[57] CGGCCTTGCAATTGCAACAGGAAAAACGCTCATGGAAATAC  
[58] AGATAGAACCCTTCTGACCTGAAA  
[59] GCGTAAGAATTAGTCTTTAATGCGCAGAGGTG  
[60] AGGCGGTCGAGAGCCAGCAGCAAAAAGGTTAT  
[61] CTAAAATAGCCGTCAATAGATAATAGAAGGAG  
[62] CGGAATTATTCATCAATATAATCCAACAGTAC  
[63] CTTTACACTTTGAATACCAAGTTCCTTGCTT  
[64] CTGTAAATTTGAAAACATAGCGATCAAATATA  
[65] TTTTAGTTGAAATACCGACCGTGTATTTAGGC  
[66] AGAGGCATCGACAAAAGGTAAAGTCAAGAACG

[67] GGTATTAACCGTTTTTTATTTTCATATCCTGAA  
 [68] TCTTACCAGCCAGTTACAAAATAAGCGCTAAT  
 [69] ATCAGAGAATAAGAGCAAGAAACAGTAGAAAATACATACA  
 [70] ACACCACGGAATAAGTTTATTTTGTCACAATC  
 [71] CCGGAAACGTAGCACCATTACCATCCGTCACC  
 [72] GTAAAAGATTTTATAATCAGTGAGAACGCGCG  
 [73] ATCACTTGAATACTTCTTTGATTATGTTATCC  
 [74] CCGCCAGCCTGGTAATATCCAGAATTGGGAAG  
 [75] GAAATGGACTACATTTTGACGCTCGAGTAACA  
 [76] GTCACACGTTATTTACATTGGCAGAGCATAAA  
 [77] GCCAACAGACCAGTAATAAAAGGGTTAACATC  
 [78] GAATGGCTATACGTGGCACAGACAAGCTATAT  
 [79] GCCACGCTAGTATTAACACCGCCTAGTTTCAT  
 [80] AGATTAGATCTTTAGGAGCACTAATATTATAG  
 [81] GATGGCAATCATCATATTCCTGATCGCCAAA  
 [82] CCTGATTGTCTGGGAGAAACAATAACATTCAGT  
 [83] TAGAATCCCGTCGCTATTAATTAATACCAAGC  
 [84] AATGGTTTAATTTTCATCTTCTGACAGGGAGTT  
 [85] TAAAGTACTTTTCGAGCCAGTAATAGAATTGCG  
 [86] CAAGCAAGACCAAGTACCGCACTCCGTAACAC  
 [87] CCTAATTTACGCTAACGAGCGTCTCGGGGTTT  
 [88] GCCCAATAGATAACCCACAAGAATCGTTCCAG  
 [89] ACGCAAAGTAAAGGTGGCAACATACGTTTTCA  
 [90] GTCACCAATGAAACCATCGATAGCAGCACCGT  
 [91] AACGTCAAAGGGCGAAAAACCGTC  
 [92] TGGACTCCAAAGAACGTATCAGGGCGATGGCC  
 [93] GGTGAGTCGAGATAGCACTACGTGAACCATC  
 [94] ACCCAAATCTAAATCGGAACCCTAAAGGGAGCCCCGATT  
 [95] CGAGAAAGGAAGGGAAAGAATCAGAGCGGGAG  
 [96] GGGAGAGGCATTAATGAATCGGCCGCCACCGA  
 [97] GCTCACAAGTTTCCTGTGTGAAATGTAATAAC  
 [98] GGCGATCGTCAGGCTGCGCAACTGCAATATTA  
 [99] ACCCGTCGAACATTAAATGTGAGCAATCGTCT  
 [100] GCTAAATCAGCAATAAAGCCTCAGATTCACCA  
 [101] CAATAAATACTAATAGTAGTAGCAACATTCTG  
 [102] TTTCATTTGGTCAATAACCTGTTTATATTTT  
 [103] TCCATATAAAGTACGGTGTCTGGAGCAACAGT  
 [104] TCAGAAGCAGGTCTTTACCCTGACCAACTAAT  
 [105] GGAATTACTAATGCAGATACATAATATCAGAT  
 [106] GAATAAGGACGTAACAAAGCTGCTCGGATTCTG  
 [107] GCGAAACATGACCCCCAGCGATTATTTTCCCT  
 [108] AAAGGCCGGGTCTGAGGCTTGCCTAAATTT

[109] AATAATAAAAAGGAACAACCTAAAGAGAGAATA  
 [110] TGAGTTTCATAGGAACCCATGTACATCGAGAA  
 [111] TGCTCAGTGAAGGATTAGGATTAGTTCCAGAG  
 [112] TAAGCGTCCAGTCTCTGAATTTACTGAGTTAA  
 [113] TCGGCATTGCGTCAGACTGTAGCGTAAAAGAA  
 [114] GTTGTTCCAGTTTGGGAACAAGAGTCCACTATT  
 [115] GTAAAGCACAAAGTTTTTTGGGGTCTGGTGGTT  
 [116] GAACGTGGTAGAGCTTGACGGGGACCCTGAGA  
 [117] CGGTTTGCGTATTGGGCGCCAGGGTGGTTTTT  
 [118] AATCAGTAGCGACAGAATCAAGTTTGCCTTTATTCGGTCA  
 [119] AACATACGCCTGTCGTGCCAGCTG  
 [120] CTCTTCGCAATCATGGTCATAGCTTTCCACAC  
 [121] GTGGGAACAAGCGCCATTCGCCATGTGCGGGC  
 [122] CAAAAACAGTAGCCAGCTTTCATCGATTCTCC  
 [123] CAAGGCAAAGAATTAGCAAAATTAGGTTGTAC  
 [124] AGCTGAAAAGGTGGCATCAATTCTCATACAGG  
 [125] TTCCCAATGATACATTTTCGCAAATGGGGCGCG  
 [126] TTGCATCATTTAAATATGCAACTAACAGTTGA  
 [127] GTAAGAGCCCATAAATCAAAAATCAAAGCGGA  
 [128] GACGAGAAGAATACCACATTCAACGAGGCATA  
 [129] CGGAGATTTTCATTACCCAAATCACTTGCCCT  
 [130] GGATCGTCCTAAAACACTCATCTTAAGTACAA  
 [131] CGTTGAAACATAACCGATATATTCCTTTTGCG  
 [132] TACAAACTAGCGGAGTGAGAATAGTTTTTTCA  
 [133] GATAAGTGAGGGATAGCAAGCCCAGTCACCAG  
 [134] CTTTTGATCTGAGACTCCTCAAGAACCAGGCG  
 [135] TAGCCCCCGCCAGAATGGAAAGCGATACATGG  
 [136] GGCAAAATCCCTTATAAATCAAAAGAATAGCC  
 [137] CCGAAATCCGAAAATCCTGTTTGAGAGGTGCC  
 [138] GAGTTGCAGCCCTTCACCGCCTGGAAGCCGGC  
 [139] CTTTCCAGTCGGGAAAAGCCGGAA  
 [140] GCATAAAGCCGAGCTCGAATTCGTTATTACGC  
 [141] CAGCTGGCTGCCGAAACCAGGCAAAACGGCG  
 [142] GATTGACCCGCGTCTGGCCTTCCTTTATGACCCTGTAATA  
 [143] TTTAGTTTGACCATATCTGCGAA  
 [144] CGAGTAGACTGTAGCTCAACATGTAAAAGATT  
 [145] AAGAGGAACAGAAAACGAGAATGAAACACTAT  
 [146] CATAACCCATCAGTTGAGATTTAGACACCAGA  
 [147] ACGAGTAGTGACAAGAACCGGATATGTATCAT  
 [148] CGCCTGATGAGGCAAAAGAATACAACCCTCAG  
 [149] CAGCGAAAACAACCATCGCCACGATCTCCAA  
 [150] AAAAAAGGAACTTTCAACAGTTTCACAACGCC

[151] TGTAGCATCACCACCCTCATTTTCCCGTCGAG  
 [152] AGGGTTGATGAAAGTATTAAGAGGGATACAGG  
 [153] AGTGTACTATAAATCCTCATTAATATTAGCGTTTGCCA  
 [154] CTTTTGCGGGAGAAGCGCCATCAAAAATAATTGTAATGGG  
 [155] GGTAATAAGTTTTTAACCTATTATTCTGAAACATATAAGTA  
 [156] AACCAGAGTCTTTTCATAATCAAAAGAACCAC  
 [157] CCACCACCGGAACCGCCTCCCTCAGAGCCGCC  
 [158] TCCACGCTGGTTTGCCCCAGCAGG  
 [159] CAGTGAGACGGGCAACAGCTGATTGCAAGCGG  
 [160] CTGGGGTGTTGCGCTCACTGCCCGCTTTTCAC  
 [161] GATGTGCTAGAGGATCCCCGGGTATGTAAAGC  
 [162] ATAGGTCACCGGCACCGCTTCTGGGAAAGGGG  
 [163] GACTTCAAATTGCTGAATATAATG  
 [164] CAGACGACAATGCTTTAAACAGTTGCCCGAAA  
 [165] GCTTGAGAACAGGTAGAAAGATTCTCGTTTAC  
 [166] TCGAAATCTCATCAAGAGTAATCTTAAATTGG  
 [167] CGGAACGACCAACCTAAAACGAAAAAATTGTG  
 [168] GGAGCCTTTGCGCCGACAATGACAGACAGCAT  
 [169] CAGCCCTCTGGGATTTTGCTAAACCTCCAAA  
 [170] TAGCCCGGCCGCCACCCTCAGAGCTCCACAGA  
 [171] ACTCACATTAATTGCGCCTAATGA  
 [172] GTGAGCTACCTGCAGGTCGACTCTGCAAGGCG  
 [173] ATTAAGTTCACTCCAGCCAGCTTTCGTTGGTG  
 [174] TAGATGGGTTTAACCAATAGGAACCTTTATTTCAACGCAA  
 [175] GATGGCTTAGAGCTTAATATCGCG  
 [176] TTTTAATTCATTGAATCCCCCTCAGATAAAAA  
 [177] CCAAAATAACGGAACAACATTATTTGGTTTAA  
 [178] TTTCAACTATAGGCTGGCTGACCTCGCGACCT  
 [179] GCTCCATGTGCCACTACGAAGGCAGGGTAGCA  
 [180] ACGGCTACGCTTGATACCGATAGTTAATTGTA  
 [181] TCGGTTTAAAATGAATTTTCTGTAATAGTTAG  
 [182] CGTAACGAACCGCCACCCTCAGAAAATAGGTG  
 [183] TATCACCGCTGCCTATTTTCGGAACGGGGTCAGTGCCTTGA  
 [184] GTCAGACGATTGGCCTTGATATTCACAAACAA  
 [185] CACCAGAGCCTCAGAGCCGCCACCATCACCGG  
 [186] CGCATCGTAACCGTGCGGCCTCAGGAAGATCGGGGTAACG  
 [187] TATATTTTGGATAAAAATTTTGTAGTTGTATAA  
 [188] AGGTAAAGAAATGCAATGCCTGAGAAAAGTAG  
 [189] AGACAGTCATTCAAAAGGGTGAGAAAAGGCTA  
 [190] AAATCACCATCAATATGATATTCAACCGTTCT  
 [191] ACCCTCAGAACCGGCCACCCTCAGAGCCACCACCCGCCGCC  
 [192] CCAGGGTTGTGCCAAGCTTGCATG

[193] AAAGCGAAAGAGGTCATTTTTGCG  
 [194] CTTTTGCAAATCGTCATAAATATTCGAGCTTC  
 [195] TGTGAATTTTAATAAAACGAACTAGCGAGAGG  
 [196] CCGGAACGTGTACAGACCAGGCGCTTAATCAT  
 [197] TGAGGACTCGGGTAAAATACGTAATTACTTAG  
 [198] CTTTCGAGGTGAATTTCTTAAACAAGAGGCTT  
 [199] TTTGTCGTCTTTCCAGACGTTAGTTCAGCTTG  
 [200] AGGTTTAGTACCGCCACCCTCAGATCTAAAGT  
 [201] GCCCGTATAAACAGTTAATGCCCCTACTCAGG  
 [202] AGCATTGACAGGAGGTTGAGGCAGGTAACAGT  
 [203] TGTAACGACGGCCATTCCCAGT  
 [204] CACGACGTGGACGACGACAGTATCATCTGCCAGTTTGAGG  
 [205] TCGCATTAATTTTTGTAAATCAGCTCATTT  
 [206] GCAAATATCCCAAAAACAGGAAGAAACCCTCA  
 [207] CATGTCAAGATGAACGGTAATCGTTAATGTGT  
 [208] TCAGGTCATTTTTGAGAGATCTACAAGGCCGG  
 [209] ATTGCTCCTTTTGATACCAGACCG  
 [210] GAAGCAAAGCGTCCAATACTGCGGAAAGAAGT  
 [211] TTTGCCAGGGAAGAAAAATCTACGACCTTATG  
 [212] CGATTTTAGAGGACAGATGAACGGAGGCGCAG  
 [213] ACGGTCAAGGAAGTTTCCATTAAAAAAGACTTTTTCATGA  
 [214] TCATAAGGGAACCGAACTGACCAACTTTGAAAAGAAGTGG  
 [215] TAAACGTTAATATTTTGTTAAAT  
 [216] ACCCCGGTTGATAATCAGAAAAGCTTAAATTG  
 [217] GAGTCTGGAGCAAACAAGAGAATCTCATATGT  
 [218] AATTAATGCCGGAGAGGGTAGCTATTGCCTGA  
 [219] GGTCAGGATTAGAGAGTACCTTTAAGCTGATA  
 [220] ATAGTAAAATGTTTAGACTGGATACTCCAACA  
 [221] CTCATTATACCAGTCAGGACGTTGAGGGGGTA

Staple DNA sequences for the panda in Figure 2D

[0] GCTTGATACCGATAGTGTGAATTTCTTAAACATTTTTTCA  
 [1] TTAAGAGGCTATTATTCTGAAACA  
 [2] TTTCTGTACTTTCCAGACGTTAGTTGAAAGTA  
 [3] CGTTGAAAGAATTGCGAATAATAAAAATGAAT  
 [4] AAACAGTTAATGCCCCCTGCCTAT  
 [5] GCCCGTATGTAACAGTTTTCGGAACCTGAGACT  
 [6] CCTCAAGATCTAAAGTTTTGTCGTTGGGATTT  
 [7] TGCTAAACAAAGGAACAATAAAGATCTCCAA  
 [8] AAAAAAGGTCAGCTTGCTTTTCGAGTGCGCCGA  
 [9] CAATGACAGGTCGCTGAGGCTTGCAGGGAGTTAAAGGCCG  
 [10] TGAGTTAAGCCCAATAATAAGAGCACAAGAATGATAACCC

[11] GAAGGATTAGGATTAGGGGGTCAGTGCCTTGA  
 [12] GAGAATAGAACTTTC AACAGTTTCCTGACCAA  
 [13] TCGGTTTACTCCAAAAGGAGCCTTCTAAAACA  
 [14] ATATATTCACAACCATCGCCACGAAAGACTT  
 [15] CTTTTGCGGGATCGTCACCCTCAGCAGCGAAA  
 [16] GTTTATCAGTTCAGCTAATGCAGA  
 [17] AATCAAGACTTGCGGGAGGTTTTGACGCGCCT  
 [18] AAGAAACAGCGCTAATATCAGAGAAAGCCTTA  
 [19] CGACAATAAACAACATACAATAGA  
 [20] TAAGTCCTTTAGCGAACCTCCCGATTAGTTGC  
 [21] TATTTTGCCTCAGAGGGTAATTGAATGAAATAGCAATAGC  
 [22] CCACCACCGGAACCGCCTCCCTCA  
 [23] GAGCCGCCGGTAATAAGTTTTAACCGGGGTTTTGCTCAGT  
 [24] TCCACAGACAGCCCTCATAGTTAGCGTAACGA  
 [25] CTTTGAAATCATAAGGGAACCGAAAGCGGAGT  
 [26] CTCATCTTGAGGCAAAAGAATACATAATTGTA  
 [27] TTTTCATGAAGAGGCTTTGAGGACTCATAACCG  
 [28] AGATAGAACCCTTCTGACATTCTGGCCAACAGAATACTTC  
 [29] AAACCCTCTCACCTTGCTGAACCTAGGGTTAG  
 [30] AATCAATATCTGGTCAGTTGGCAAAGATTAGA  
 [31] TATCTTACCGAAGCCCGAACACCCTGAACAAAACCCAGCT  
 [32] GACAGCATCGGAACGAGGGTAGCAACGGCTACGGAAGTTT  
 [33] TTTGATTAAATTAACCGTTGTAGC  
 [34] AAAATAATAATTCTGTCCAGACGA  
 [35] ACAATTTTAAGAACGCGAGGCGTTGAACAAGA  
 [36] AACCGCCAATCACCGGAACCAAGAG  
 [37] GATAAGTGGATACAGGAGTGTACTACCCTCAG  
 [38] ATGAACGGACAACGCCTGTAGCATACCAGGCG  
 [39] AGCGATTAAAGGCGCAGACGGTCAAGAGGACAG  
 [40] CCATTAAACCAACCTAAAACGAAATGACCCCC  
 [41] GTCTGTCCATCACGCAGTAATAAC  
 [42] ATCACTTGACCAGTAATAAAAGGGACCTGAAAGCGTAAGA  
 [43] GAGAGCCAGCAGCAAATGAAAAATCTAAAGCA  
 [44] AACCTACCACTTCTGAATAATGGACAAATATC  
 [45] CAACTAATATCAACAGTTGAAAGG  
 [46] AGCACTAATCTTTAGGAATTGAGGAAGGTTAT  
 [47] CTAAAATACCTTTTTTTAATGGAAACAGTACATAAATCAAT  
 [48] AATAAGAATAAACACCGGAATCAT  
 [49] AATTACTACGACAAAAGGTAAAGTATCCCATC  
 [50] CTAATTTAGCTTATCCGGTATTCTATCCTGAA  
 [51] TCTTACCAGACGGGAGAATTAACCTTTTTTAAGAAAAGTAA  
 [52] CCATTTGGGAATTAGAGCCAGCAA



[53] AATCACCATCTTTTCATAATCAAACCCTCAGA  
 [54] GCCACCACATACATGGCTTTTGATCCGTCGAG  
 [55] AGGGTTGAGTCACCAGTACAACTTGTACAGA  
 [56] CCAGGCGCTTACTTAGCCGGAACGTACCAAGC  
 [57] GCGAAACATGCCACTACGAAGGCACGGGTAAAATACGTAA  
 [58] GCCGTCAATAGATAATTGATTGTTTGGATTATATATCAAA  
 [59] AAGTACAACGGAGATTCGCGACCTGCTCCATGATAGGCTG  
 [60] GAAGAAGTCCACCGAGTAAAAGA  
 [61] CACAGACAATTCACCAGTCACACGCCTGAGTA  
 [62] ATTATTTGGCAACAGTGCCACGCTATACGTGG  
 [63] GTGAATAAAATTTTCATTTGAATTA  
 [64] TTGGGTTATACCTTTTAACTCCATATGTGA  
 [65] CTGTTTAGGATAAATAAGGCGTTAGGCTTAGG  
 [66] TAGAAACCAGAGAATATAAAGTACGAAAAAGC  
 [67] GAGCGTCTAAATCAGATATAGAAGCGAGCATG  
 [68] CCGAACAAACAGGGAAGCGCATTAAACGCTAAC  
 [69] GAATAAGTTAAAAGAAACGCAAAGGCAGATAG  
 [70] ATTACCATCCGTCACCGACTTGAGACACCACG  
 [71] CCGCCACCTTATTAGCGTTTGCCAGTAGCACC  
 [72] TAGCCCGGCGTTCCAGTAAGCGTCCCTCAGAG  
 [73] GCTGACCTCGTAACACTGAGTTTCTATAAGTA  
 [74] CTAAACAGGAGGCCGATTAAAGGG  
 [75] ATTTTAGATTTTATAATCAGTGAGCAAATAT  
 [76] CGGCCTTGTTATTTACATTGGCAGATATTTT  
 [77] GAATGGCTAGTATTAACACCGCCTCACGTAAA  
 [78] ACAGAAATTCATCAATATAATCCACATTTGA  
 [79] GGATTTAGAAGTATTAGACTTTACAAACAATT  
 [80] CGACAACCTCGTATTAAATCCTTTGCCCCGAACG  
 [81] TTATTAATATTAATTACATTTAACCCTTGCTT  
 [82] CTGTAAATCATAGGTCTGAGAGACTATAACTA  
 [83] TATGTAAAGAAATACCGACCGTGTTATCATAT  
 [84] GCGTTATATTTGAGCCAGTAATAAATCAATA  
 [85] ATCGGCTGGCGCCCAATAGCAAGCTTCCAGAG  
 [86] CCTAATTTAGAGAATAACATAAAAAGTTACCA  
 [87] GAAGGAAATAAAGGTGGCAACATATTATTTG  
 [88] TCACAATCTAAAGGTGAATTATCATAGCAAGG  
 [89] CCGGAACTTCGGTCATAGCCCCCAGAACCAC  
 [90] CACCAGAGCAGTCTCTGAATTTACAATAGGTG  
 [91] TATCACCAGATAGGAACCCATGTACTCATCAAG  
 [92] AGTAATCTAAATTGTGTCGAAATCTGTATCATCGCCTGAT  
 [93] TCGTTTACCAGACGACGATAAAAACCAAATA  
 [94] AGAAGTGTGAGGAACGGTACGCCATTGACGAG

[95] CTGGTAATATCCAGAACAATATTACCGCCAGC  
 [96] TGACAAGAACCGGATAAGGGATAGCAAGCCCATACTCAGG  
 [97] GCGAGAGGCTTTTGCAAACACTATCATAACCCATCAGTTG  
 [98] AAACAGTTCATTGAATCCCCCTCAAAAAGATT  
 [99] CAGAAAACGAGAATGACCATAAATCAAAAATC  
 [100] TTAATGCGAATCGTCTGAAATGGA  
 [101] TGCGTAGACAGAGGTGAGGCGGTCATTAGTCT  
 [102] TTCCTGATTATCAGATGATGGCAAAAAGAAAT  
 [103] AAACCACCAGAAGGAGCGGAATTATCATCATA  
 [104] TTTGAGTAACATTATCATTTTGCAGGAACAAAG  
 [105] TTAATTAAACATCAAGAAAACAAATTTAAAAG  
 [106] CAAATCCAGTGAATTTATCAAAATCGTCGCTA  
 [107] TACCAGTACTAAATTTAATGGTTTTGCTGATG  
 [108] TATCATTCATTTAGGCAGAGGCATCAAATTCT  
 [109] CAAAATAACGTAGGAATCATTACCTCTTTCCT  
 [110] ACGCAATAATAGCAGCCTTTACAGGCCAGTTA  
 [111] ATTCATATGTAGAAAATACATACACCGAGGAA  
 [112] TGAAACCAGACGGAAATTATTCATAATAGAAA  
 [113] AGCATTGACGTTTTTCATCGGCATTGTCACCAA  
 [114] AGGTTTAGGCCAGAATGGAAAGCGCCGCCGCC  
 [115] CTCATTATACCTTATGCGATTTTA  
 [116] AGATTTAGACAGGTAGAAAGATTCAGAACTGG  
 [117] ACGTGCTTTCCTCGTTAGAATCAGAGCGGGAG  
 [118] CACGTATAGCGTACTATGGTTGCTGAATCCTG  
 [119] CTACATTTTGACGCTCCGAACCTGA  
 [120] TAGCCCTACCAGCAGAAGATAAAATTTTCAGGTTTAACGT  
 [121] GAAGATGATGAAACAATTTTCCCT  
 [122] TAGAATCCCTGAGAAGAGTCAATAATCGCAAG  
 [123] ACAAAGAAAATTTTCATCTTCTGACTAAAGCCA  
 [124] ACGCTCAAACAACGCCAACATGTACAAGAACG  
 [125] GGTATTAACCGTTTTTTATTTTCATACAGCCAT  
 [126] ATTATTTAAACGTCAAAAATGAAAATAACGGA  
 [127] ATACCCAACAGTATGTTAGCAAACGGTTTACC  
 [128] AGCGCCAAAGGGAAGGTAAATATTTTCGATAGC  
 [129] AGCACCGTGCGTCAGACTGTAGCGCAGGAGGT  
 [130] TGAGGCAGATAAATCCTCATTAATAACGCCA  
 [131] CCCTCAGACACCACCCTCATTTTCTTCATTAC  
 [132] CCAAATCACTTGCCCTGACGAGAAACACCAGA  
 [133] ACGAGTAGTTAATCATTGTGAATTACCAGTCA  
 [134] GGACGTTGACGGAACAACATTATTGAATACCA  
 [135] CATTCAACGAGGCATAGTAAGAGCAAAGAAGTTTTGCCAG  
 [136] GCGTCCAATACTGCGGAATCGTCATAAATATT

[137] AAGAGGAAAAAGCGGATTGCATCAAATGCTTT  
[138] GGAAATACCATTGCAACAGGAAAAGAGGTGCC  
[139] ACGAACC AAAACATCGCCATTAAAGTTGTTCC  
[140] CTTTTACACAGATGAATATACAGTCCCTGAGA  
[141] CCTGATTGTCTGGGAGAAACAATAAAACGCGCG  
[142] GCGCAGAGCTTTGAATACCAAGTTTTGCGCTC  
[143] GAGCAAAAGCGAATTATTCATTTTCAGCCGGAA  
[144] TTAAGACGTTGAAAACATAGCGATAATCATGG  
[145] TTTTAGTTCTGCGAGAAAACTTTTTGTGCCAAG  
[146] CATATTTACAGTAGGGCTTAATTGTATTACGC  
[147] CAAGCAAGACCAAGTACCGCACTCCCGGCACC  
[148] TTTTGTTTTCCCAATCCAAATAAGAAACGGCG  
[149] TTATTACGAAGAACTGGCATGATTTTAAATCA  
[150] ATTGAGGGAGACAAAAGGGCGACAAAAACTAG  
[151] TGCCTTTAAATCAGTAGCGACAGAAAGGCCGG  
[152] ACAAACAAGTCAGACGATTGGCCTAGCATAAA  
[153] CTCAGAGCACCGCCACCCTCAGAAAGCTATAT  
[154] GAATAAGGACGTAAACAAAGCTGCTTCTGCGAA  
[155] TTTCAACTTAAATTGGGCTTGAGATTTAAATA  
[156] ACGAACTAGGAAGAAAAATCTACGAGAGGTCA  
[157] GGAATTACTAATGCAGATACATAATTAGAGAG  
[158] ACTGGATAAGGGGGTAATAGTAAACCAGACCG  
[159] GCCCGAAAGACTTCAAATATCGCGTTTTAATT  
[160] AGGTCTTTACCCTGACTATTATAGTCAGAAGC  
[161] CGAGAAAGGAAGGGAATGCGCCGCTACAGGGC  
[162] GTAAAGCACAAAGTTTTTTTGGGGTCACGCTCAT  
[163] AGTTTGGACGAGATAGGGTTGAGTAATACCGA  
[164] GAGTTGCAGCCCTTCACCGCCTGGAACAGTAC  
[165] GGGAGAGGCATTAATGAATCGGCCCCGGATTCTG  
[166] ACTGCCCCGACTCACATTAATTGCGACAAAATC  
[167] GCATAAAGTTCCACACAACATACGAATTACCT  
[168] TCATAGCTCCGAGCTCGAATTCGTAGCTTAGA  
[169] CTTGCATGTGTAAAACGACGGCCACAAATATA  
[170] CAGCTGGCGTGCGGGGCCTCTTCGCAGAATCGC  
[171] GCTTCTGGCACTCCAGCCAGCTTTATCGAGAA  
[172] GATTGACCGATTCTCCGTGGGAACAAACGATT  
[173] GCTCATTTTTCGCATTAATTTTTGAAGACTCC  
[174] CATGTCAAGATGAACGGTAATCGTTTCAACCG  
[175] AGACAGTCATTCAAAAGGGTGAGAATCAAGTT  
[176] GCTAAATCAGCAATAAAGCCTCAGTGATATTC  
[177] TTTCATTTGGTCAATAACCTGTTTCCGCCACC  
[178] CGAGTAGAACAGTTGATTCCCAATCATTCAAGT

[179] TGCAACTACTGTAGCTCAACATGTTGGTTTAA  
 [180] TTTTGTGCGATTGCTCCTTTTGATATTAATAAA  
 [181] TACCTTTACTCCAACAGGTCAGGACGCCAAAA  
 [182] GAAGCAAACGAGCTTCAAAGCGAAATGTTTAG  
 [183] GATGGCTTAGAGCTTAATTGCTGAATATAATGAAGTACGG  
 [184] GAACCCTAAAGCCGGCGAACGTGG  
 [185] CCACTATTGAACCATCACCCAAATCTAAATCG  
 [186] TCCACGCTAATCAAAAGAATAGCCACAAGAGT  
 [187] GTATTGGGCGGGCAACAGCTGATTGCAAGCGG  
 [188] TCGGGAAACCTGTCGTGCCAGCTGCGGTTTGC  
 [189] CTGGGGTGCCTAATGAGTGAGCTACTTTCCAG  
 [190] TGTGAAATTGTTATCCGCTCACAATGTAAAGC  
 [191] TCGACTCTAGAGGATCCCCGGGTAGTTTCCTG  
 [192] GATGTGCTTTCCCAGTCACGACGTCCTGCAGG  
 [193] ACCAGGCATTGGGAAGGGCGATCGGAAAGGGG  
 [194] ATAGGTCAGGCCTCAGGAAGATCGTGCCGGAA  
 [195] ATAGGAACGAGTAACAACCCGTCGGTAATGGG  
 [196] ACCCCGGTAATATTTTGTTAAAATTTTAACCA  
 [197] ATCAATATAGCAAACAAGAGAATCTCATATGT  
 [198] CAAAAACATAATGTGTAGGTAAAGAAATCACC  
 [199] AGCTGAAAAGAATTAGCAAAATTAGGTTGTAC  
 [200] GACCATTAGATACATTTTCGCAAATGGGGCGCG  
 [201] TGTCTGGAAGTTTTCATTCCATATATTTAGTTT  
 [202] TAGAGCTTGACGGGGAAAGGGAGC  
 [203] CCCCATTGCGATGGCCCACTACGTAAAGAACG  
 [204] TGGACTCCGGCAAAATCCCTTATAGGTTTGCC  
 [205] CCAGCAGGCTTTTCACCAGTGAGACGCCAGGGTGGTTTTT  
 [206] GGGTAACGCCAGGGTTGCAAGGCG  
 [207] ATTAAGTTTCAGGCTGCGCAACTGAAGCGCCA  
 [208] TTCGCCATGGACGACGACAGTATCCGTTGGTG  
 [209] TAGATGGGAACATTAAATGTGAGCGCCATCAA  
 [210] AAATAATTTTAAATTGTAAACGTTTGATAATC  
 [211] AGAAAAGCTTGCCTGAGAGTCTGGGATATTCA  
 [212] ACCGTTCTAAATGCAATGCCTGAGTTATGACC  
 [213] CTGTAATACATACAGGCAAGGCAAAGGTGGCATCAATTCT  
 [214] CGAAAATCCTGTTTGATGGTGGTTCCGAAATCAACGTCAA  
 [215] ACTAATAGTAGTAGCATTAACATCCAATAAATCTTTTGCG  
 [216] AGGGCGAAAAACCGTCTATCAGGG  
 [217] AACCGTGCATCTGCCAGTTTGAGG  
 [218] GCCTTCCTGTAGCCAGCTTTCATCCGCATCGT  
 [219] CAGGAAGATTGTATAAGCAAATATCGCGTCTG  
 [220] AATTAATGAAAGGCTATCAGGTCACCCAAAAA

[221] GGAGAAGCAACCCTCATATATTTTAGCTGATA

[222] TTTTGGAGAGATCTACCCGGAGAG

[223] GGTAGCTAGGATAAAAATTTTAGCTTTATTTCACGCAA
